# Supplementary material for: miRSeq: A User-Friendly Standalone Toolkit for Sequencing Quality Evaluation and miRNA Profiling
Source: PubMed Central journal article supplement (PMC4119685; doi:10.1155/2014/462135), 2014-06-24
Supplement: 462135.f1.pdf [file 462135.f1.pdf]

**Supplementary Table 1. Statistics of data resources.** The numbers of annotated transcripts from 105 species are tabulated.

| <b>Species</b>                  | <b># pre-miRNA</b> | <b># rRNA</b> | <b># tRNA</b> | <b># mRNA</b> | <b># ncRNA</b> |
|---------------------------------|--------------------|---------------|---------------|---------------|----------------|
| <i>Acyrtosiphon pisum</i>       | 117                | 34            | 0             | 17,674        | 930            |
| <i>Aedes aegypti</i>            | 101                | 11            | 0             | 16,785        | 0              |
| <i>Amphimedon queenslandica</i> | 8                  | 3             | 0             | 9,814         | 94             |
| <i>Anolis carolinensis</i>      | 282                | 2             | 0             | 16,533        | 236            |
| <i>Anopheles gambiae</i>        | 67                 | 6             | 422           | 0             | 0              |
| <i>Apis mellifera</i>           | 218                | 72            | 0             | 10,607        | 1,245          |
| <i>Artibeus jamaicensis</i>     | 19                 | 0             | 0             | 0             | 0              |
| <i>Ascaris suum</i>             | 97                 | 8             | 0             | 0             | 0              |
| <i>Ateles geoffroyi</i>         | 60                 | 0             | 0             | 0             | 0              |
| <i>Bombyx mori</i>              | 489                | 10            | 0             | 15,121        | 620            |
| <i>Bos taurus</i>               | 798                | 3             | 4,161         | 32,210        | 2,371          |
| <i>Branchiostoma belcheri</i>   | 118                | 0             | 0             | 0             | 0              |
| <i>Branchiostoma floridae</i>   | 156                | 9             | 0             | 28,623        | 0              |
| <i>Brugia malayi</i>            | 134                | 9             | 0             | 11,460        | 0              |
| <i>Caenorhabditis brenneri</i>  | 214                | 6             | 1,096         | 0             | 0              |
| <i>Caenorhabditis briggsae</i>  | 177                | 4             | 958           | 19,404        | 0              |
| <i>Caenorhabditis elegans</i>   | 223                | 7             | 820           | 26,066        | 23,837         |
| <i>Caenorhabditis remanei</i>   | 156                | 5             | 971           | 31,476        | 0              |
| <i>Canis familiaris</i>         | 324                | 0             | 906           | 0             | 0              |
| <i>Capitella teleta</i>         | 124                | 4             | 0             | 0             | 0              |
| <i>Cerebratulus lacteus</i>     | 2                  | 3             | 0             | 0             | 0              |
| <i>Ciona intestinalis</i>       | 348                | 5             | 0             | 14,181        | 625            |
| <i>Ciona savignyi</i>           | 27                 | 10            | 0             | 0             | 0              |
| <i>Cricetulus griseus</i>       | 200                | 0             | 0             | 21,607        | 438            |
| <i>Culex quinquefasciatus</i>   | 74                 | 20            | 0             | 18,883        | 0              |
| <i>Cyprinus carpio</i>          | 134                | 3             | 0             | 0             | 0              |
| <i>Danio rerio</i>              | 346                | 17            | 12,292        | 27,226        | 1,054          |
| <i>Daphnia pulex</i>            | 44                 | 8             | 0             | 0             | 0              |
| <i>Drosophila ananassae</i>     | 76                 | 2             | 0             | 15,070        | 519            |
| <i>Drosophila erecta</i>        | 81                 | 8             | 0             | 15,048        | 568            |
| <i>Drosophila grimshawi</i>     | 82                 | 0             | 0             | 14,986        | 430            |

|                                    |       |    |     |        |        |
|------------------------------------|-------|----|-----|--------|--------|
| <i>Drosophila melanogaster</i>     | 238   | 18 | 304 | 27,749 | 1,616  |
| <i>Drosophila mojavensis</i>       | 71    | 3  | 0   | 14,595 | 396    |
| <i>Drosophila persimilis</i>       | 75    | 17 | 0   | 16,878 | 474    |
| <i>Drosophila pseudoobscura</i>    | 210   | 3  | 0   | 0      | 0      |
| <i>Drosophila sechellia</i>        | 78    | 38 | 0   | 16,471 | 579    |
| <i>Drosophila simulans</i>         | 136   | 3  | 0   | 15,415 | 498    |
| <i>Drosophila virilis</i>          | 74    | 10 | 0   | 14,491 | 654    |
| <i>Drosophila willistoni</i>       | 77    | 30 | 0   | 15,513 | 496    |
| <i>Drosophila yakuba</i>           | 80    | 11 | 0   | 16,082 | 521    |
| <i>Echinococcus granulosus</i>     | 23    | 2  | 0   | 0      | 0      |
| <i>Echinococcus multilocularis</i> | 22    | 0  | 0   | 0      | 0      |
| <i>Equus caballus</i>              | 341   | 3  | 503 | 20,675 | 700    |
| <i>Fugu rubripes</i>               | 129   | 0  | 0   | 0      | 0      |
| <i>Gallus gallus</i>               | 734   | 2  | 242 | 32,181 | 4,853  |
| <i>Glottidia pyramidata</i>        | 1     | 3  | 0   | 0      | 0      |
| <i>Gorilla gorilla</i>             | 322   | 5  | 0   | 70     | 0      |
| <i>Haemonchus contortus</i>        | 187   | 1  | 0   | 0      | 0      |
| <i>Haliotis rufescens</i>          | 5     | 0  | 0   | 0      | 0      |
| <i>Heliconius melpomene</i>        | 92    | 6  | 0   | 0      | 0      |
| <i>Hippoglossus hippoglossus</i>   | 40    | 0  | 0   | 0      | 0      |
| <i>Homo sapiens</i>                | 1,872 | 29 | 631 | 37,246 | 11,679 |
| <i>Hydra magnipapillata</i>        | 17    | 17 | 0   | 16,989 | 364    |
| <i>Ictalurus punctatus</i>         | 281   | 6  | 0   | 1,288  | 0      |
| <i>Ixodes scapularis</i>           | 49    | 6  | 0   | 20,467 | 0      |
| <i>Lagothrix lagotricha</i>        | 48    | 0  | 0   | 0      | 0      |
| <i>Lemur catta</i>                 | 16    | 0  | 0   | 0      | 0      |
| <i>Leucosolenia complicata</i>     | 1     | 0  | 0   | 0      | 0      |
| <i>Locusta migratoria</i>          | 7     | 0  | 0   | 0      | 0      |
| <i>Lottia gigantea</i>             | 60    | 1  | 0   | 0      | 0      |
| <i>Macaca mulatta</i>              | 615   | 3  | 379 | 27,091 | 3,053  |
| <i>Macaca nemestrina</i>           | 74    | 0  | 0   | 0      | 0      |
| <i>Macropus eugenii</i>            | 3     | 3  | 0   | 0      | 0      |
| <i>Manduca sexta</i>               | 94    | 0  | 0   | 0      | 0      |
| <i>Marsupenaeus japonicus</i>      | 6     | 0  | 0   | 0      | 0      |

|                                      |       |    |       |        |       |
|--------------------------------------|-------|----|-------|--------|-------|
| <i>Monodelphis domestica</i>         | 460   | 3  | 0     | 19,073 | 438   |
| <i>Mus musculus</i>                  | 1,186 | 6  | 433   | 29,707 | 6,060 |
| <i>Nasonia giraulti</i>              | 32    | 2  | 0     | 0      | 0     |
| <i>Nasonia longicornis</i>           | 28    | 0  | 0     | 0      | 0     |
| <i>Nasonia vitripennis</i>           | 53    | 8  | 0     | 12,927 | 272   |
| <i>Nematostella vectensis</i>        | 49    | 44 | 0     | 24,780 | 0     |
| <i>Oikopleura dioica</i>             | 66    | 7  | 0     | 243    | 0     |
| <i>Ornithorhynchus anatinus</i>      | 396   | 5  | 0     | 17,183 | 469   |
| <i>Oryzias latipes</i>               | 168   | 3  | 0     | 22,084 | 391   |
| <i>Ovis aries</i>                    | 105   | 0  | 0     | 22,733 | 251   |
| <i>Pan paniscus</i>                  | 88    | 3  | 0     | 29,610 | 3,344 |
| <i>Pan troglodytes</i>               | 656   | 8  | 463   | 35,265 | 4,114 |
| <i>Panagrellus redivivus</i>         | 199   | 4  | 0     | 0      | 0     |
| <i>Paralichthys olivaceus</i>        | 20    | 0  | 0     | 0      | 0     |
| <i>Petromyzon marinus</i>            | 244   | 9  | 0     | 0      | 0     |
| <i>Pongo pygmaeus</i>                | 634   | 0  | 471   | 0      | 0     |
| <i>Pristionchus pacificus</i>        | 124   | 5  | 0     | 0      | 0     |
| <i>Pygathrix bieti</i>               | 11    | 0  | 0     | 0      | 0     |
| <i>Rattus norvegicus</i>             | 449   | 8  | 444   | 29,665 | 2,329 |
| <i>Rhipicephalus microplus</i>       | 24    | 2  | 0     | 0      | 0     |
| <i>Saccoglossus kowalevskii</i>      | 91    | 4  | 0     | 12,571 | 283   |
| <i>Saguinus labiatus</i>             | 42    | 0  | 0     | 0      | 0     |
| <i>Sarcophilus harrisii</i>          | 66    | 1  | 0     | 20,505 | 904   |
| <i>Schistosoma japonicum</i>         | 55    | 29 | 0     | 0      | 0     |
| <i>Schistosoma mansoni</i>           | 20    | 13 | 0     | 12,845 | 0     |
| <i>Schmidtea mediterranea</i>        | 148   | 14 | 0     | 0      | 0     |
| <i>Strigamia maritima</i>            | 3     | 3  | 0     | 0      | 0     |
| <i>Strongylocentrotus purpuratus</i> | 61    | 1  | 1,068 | 22,722 | 361   |
| <i>Sus scrofa</i>                    | 280   | 2  | 0     | 24,555 | 1,338 |
| <i>Sycon ciliatum</i>                | 1     | 1  | 0     | 0      | 0     |
| <i>Symphalangus syndactylus</i>      | 11    | 0  | 0     | 0      | 0     |
| <i>Taeniopygia guttata</i>           | 246   | 1  | 0     | 15,568 | 491   |
| <i>Terebratulina retusa</i>          | 1     | 3  | 0     | 0      | 0     |
| <i>Tetranychus urticae</i>           | 52    | 15 | 0     | 0      | 0     |

|                               |     |   |   |        |     |
|-------------------------------|-----|---|---|--------|-----|
| <i>Tetraodon nigroviridis</i> | 132 | 9 | 0 | 0      | 0   |
| <i>Tribolium castaneum</i>    | 220 | 2 | 0 | 9,916  | 291 |
| <i>Xenopus laevis</i>         | 22  | 0 | 0 | 11,034 | 18  |
| <i>Xenopus tropicalis</i>     | 189 | 0 | 0 | 0      | 0   |
| <i>Xenoturbella bocki</i>     | 8   | 1 | 0 | 0      | 0   |
